# Supplementary material for: Analysis of the Virulence and Inflammatory Markers Elicited by Enteroaggregative Escherichia coli Isolated from Clinical and Non-Clinical Sources in an Experimental Infection Model, India
Source: MDPI journal article supplement (doi:10.3390/microbiolres13040062), 2022-11-04
Supplement: s1 [file s1]

Supplementary Data:

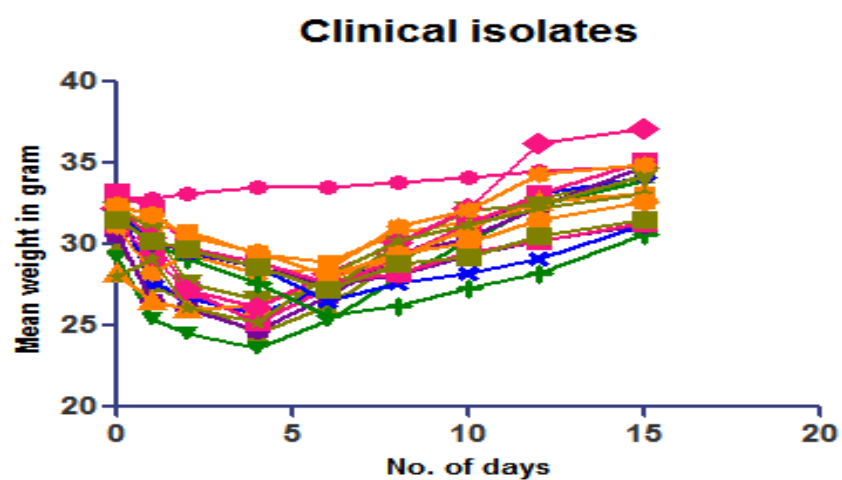

**Figure S1.** Mean weight change (gram) in Balb/C mice challenged with EAEC isolates from the human.

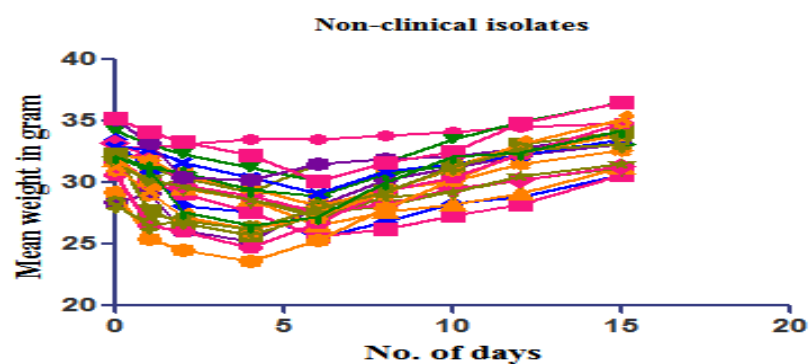

**FigureS2.** Mean weight change (gram) in Balb/C mice challenged with EAEC isolates from non-clinical (animal and environment) sources.

A

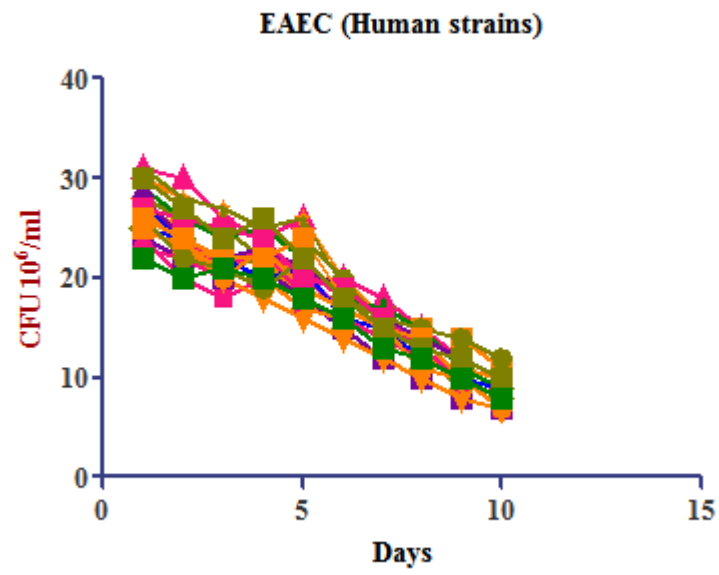

B

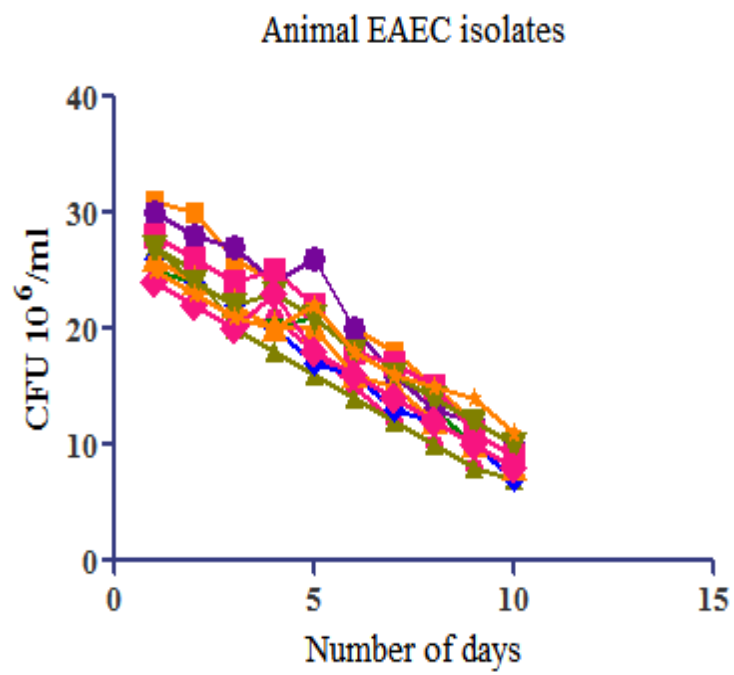

C

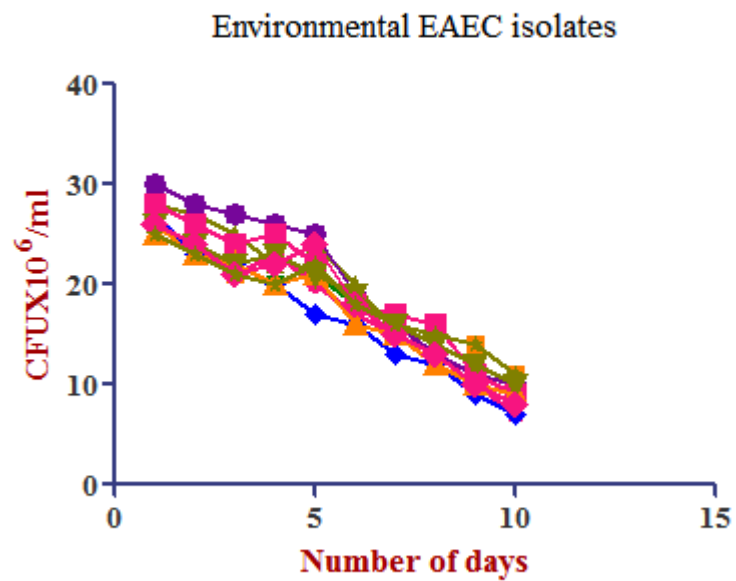

**FigureS3.** Stool shedding of EAEC in treated Balb/C mice infected with EAEC isolates of A) human, B) animal and C) environmental origin.

A)

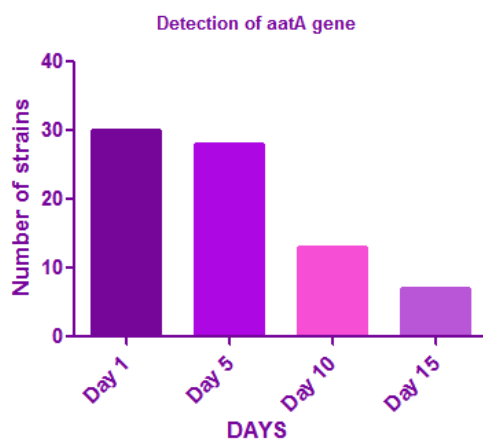

B)

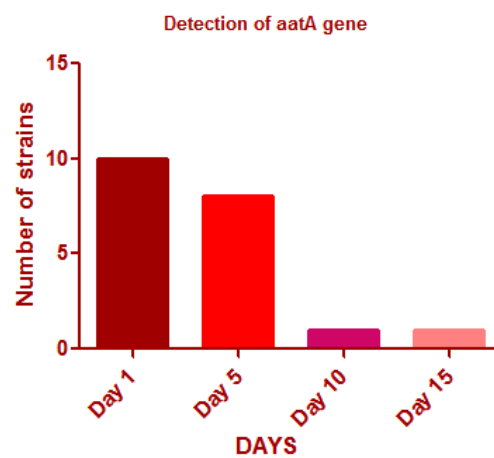

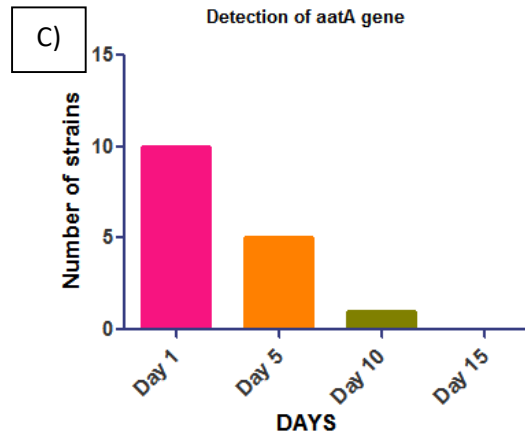

**Figure S4.** Colonization and persistence of EAEC (detected by *attA* gene of EAEC) isolate in Balb/C mice from A) human origin, B) animal origin and C) environmental origin.

**Table S1.** Primers with description of the target gene, product size in base pairs, and annealing temperature, used for the 4 multiplex polymerase chain reactions (M-PCRs) and 3 monoplex PCRs.

| Target gene and description             | Type of PCR | Primer Sequence (5'-3')                                   | PCR Product, Size (bp) | GenBank Accession No. | Annealing Temperature (°C) | References |
|-----------------------------------------|-------------|-----------------------------------------------------------|------------------------|-----------------------|----------------------------|------------|
| <i>astA</i> - EAST-1 heat-stable toxin  | M-PCR 1     | ATGCCATCAACA<br>CAGTAT<br>GCGAGTGACGGC<br>TTTGTAGT        | 110                    | L11241                | 58                         | 33         |
| <i>Pet</i> - Plasmid-encoded toxin      |             | GGCACAGAATAA<br>AGGGGTGTTT<br>CCTCTTGTTTCCA<br>CGACATAC   | 302                    | AF05658<br>1          | 58                         | 34         |
| <i>sigA</i> - IgA protease-like homolog |             | CCGACTTCTCACT<br>TTCTCCCG<br>CCATCCAGCTGC<br>ATAGTGTTTG   | 430                    | NC_0043<br>37         | 58                         | 35         |
| <i>pic</i> - Serine protease precursor  |             | ACTGGATCTTAA<br>GGCTCAGGAT<br>GACTTAATGTCA<br>CTGTTTCAGCG | 572                    | AF09764<br>4          | 58                         | 34         |

|                                                   |            |                                                                         |     |                              |    |    |
|---------------------------------------------------|------------|-------------------------------------------------------------------------|-----|------------------------------|----|----|
| <i>sepA</i> - Shigella<br>extracellular protease  |            | GCAGTGGAAATA<br>TGATGCGGC<br>TTGTTTCAGATCGG<br>AGAAGAACG                | 794 | Z48219                       | 58 | 34 |
| <i>sat</i> - Secreted<br>autotransporter toxin    |            | TCAGAAGCTCAG<br>CGAATCATTG<br>CCATTATCACCA<br>GTAAAACGCACC              | 932 | AE01407<br>5                 | 58 | 35 |
| ORF3-Cryptic protein                              | M-PCR<br>2 | CAGCAACCATCG<br>CATTCTA<br>CGCATCTTTCAAT<br>ACCTCCA                     | 121 | <u>AB26101</u><br><u>6.2</u> | 57 | 35 |
| <i>aap</i> -Dispersin,<br>antiaggregation protein |            | GGACCCGTCCCA<br>ATGTATAA<br>CCATTTCGGTTAG<br>AGCACGAT                   | 250 | Z32523                       | 57 | 35 |
| <i>aaiC</i> - AaiC, secreted<br>protein           |            | TGGTGACTACTTT<br>GATGGACATTGT<br>GACACTCTCTTCT<br>GGGGTAAACGA           | 313 | <u>AB25543</u><br><u>5.1</u> | 57 | 35 |
| <i>aggR</i> -Transcriptional<br>activator         |            | GCAATCAGATTA<br>ARCAGCGATACA<br>CATTCTTGATTGC<br>ATAAGGATCTGG           | 426 | Z18751                       | 57 | 35 |
| <i>agg4A</i> - AAF/IV<br>fimbrial subunit         |            | TGAGTTGTGGGG<br>CTAYCTGGA<br>CACCATAAGCCG<br>CCAAATAAGC                 | 169 | EU63702<br>3                 | 57 | 35 |
| <i>aggA</i> - AAF/I fimbrial<br>subunit           | M-PCR<br>3 | TCTATCTRGGGG<br>GGCTAACGCT<br>ACCTGTTCCCCAT<br>AACCAGACC                | 220 | Y18149                       | 57 | 35 |
| <i>aafA</i> - AAF/II fimbrial<br>subunit          |            | CTACTTTATTATC<br>AAGTGGAGCCGC<br>TA<br>GGAGAGGCCAGA<br>GTGAATCCTG       | 289 | AY3445<br>86                 | 57 | 35 |
| <i>agg3A</i> - AAF/III<br>fimbrial subunit        |            | CCAGTTATTACA<br>GGGTAACAAGGG<br>AA<br>TTGGTCTGGAAT<br>AACAACCTGAAC<br>G | 370 | AF41106<br>7                 | 57 | 35 |
|                                                   |            |                                                                         |     |                              |    |    |

|                                                                       |                    |                                                            |     |                              |    |    |
|-----------------------------------------------------------------------|--------------------|------------------------------------------------------------|-----|------------------------------|----|----|
| <i>aafC</i> -Usher, AAF/II assembly unit                              |                    | ACAGCCTGCGGT<br>CAAAAGC<br>GCTTACGGGTAC<br>GAGTTTTACGG     | 491 | AF11482<br>8                 | 57 | 35 |
| ORF61- Plasmid-<br>encoded hemolysin                                  | M-PCR<br>4         | AGCTCTGGAAC<br>TGGCCTCT<br>AACCGTCCTGATT<br>TCTGCTT        | 108 | <u>J02459.1</u>              | 57 | 35 |
| <i>eilA</i> - Salmonella HilA<br>homolog                              |                    | AGGTCTGGAGCG<br>CGAGTGTT<br>GTAAAACGGTAT<br>CCACGACC       | 248 | <u>CP00968</u><br><u>5.1</u> | 57 | 35 |
| <i>capU</i> -<br>Hexosyltransferase<br>homolog                        |                    | CAGGCTGTTGCTC<br>AAATGAA<br>GTTCGACATCCTT<br>CCTGCTC       | 395 | AF13440<br>3                 | 57 | 35 |
| <i>air</i> - Enteroaggregative<br>immunoglobulin repeat<br>protein    |                    | TTATCCTGGTCTG<br>TCTCAAT<br>GGTTAAATCGCTGC<br>TTCTT        | 600 | <u>CP00968</u><br><u>5.1</u> | 57 | 35 |
| <i>espY2</i> - Non-LEE-<br>encoded type III<br>secreted effector      | Singlepl<br>ex PCR | CGCAAAAGATCC<br>GGAAAATA<br>TCAGCATTGCTCA<br>GGTCAAC       | 216 | ECSP_00<br>73                | 57 | 35 |
| <i>rmoA</i> - Putative<br>hemolysin expression-<br>modulating protein | Singlepl<br>ex PCR | TTACCTTACATAT<br>TTCCATATC<br>CGAAAACAAAAC<br>AGGAATGG     | 210 | ECUMN_<br>0072               | 59 | 35 |
| <i>shiA</i> - shiA-like<br>inflammation suppressor                    | Singlepl<br>ex PCR | CAGAATGCCCCG<br>CGTAAGGC<br>CACTGAAGGCTCG<br>CTCATGATCGCCG | 292 | ECB_035<br>17                | 57 | 36 |

**Table S2: Primers used for the triplex polymerase chain reactions target gene description, base-pair size, annealing temperature, and primers concentration.**

| Gene/<br>Target | Primer Sequence (5'- 3')                   | PCR<br>Produ<br>ct,<br>bp | Annealing<br>Temperature<br>Primer<br>Concentration<br>(_C), pmol/μl | References |
|-----------------|--------------------------------------------|---------------------------|----------------------------------------------------------------------|------------|
| ChuA            | GACGAACCAACGGTCAGGT<br>TGCCGCCAGTACCAAAGAA | 279                       | 55/25                                                                | 39         |
| YjaA            | TGAAGTGTCAGGAGACGCTG                       |                           | 55/25                                                                | 39         |

|             |                                               |     |       |    |
|-------------|-----------------------------------------------|-----|-------|----|
|             | GAGTAATGTCGGGGGCATTCA                         | 211 |       |    |
| TspE4C<br>2 | GAGTAATGTCGGGGGCATTCA<br>CGCGCCAACAAAGTATTACG | 152 | 52/25 | 39 |

**Table S3: Shows the group of mice to be tested.**

|                                      |                  |                                         | <b>Group<br/>1</b>       | <b>Group<br/>2</b>                         | <b>Group 3</b>                                                                                                                                                                                                  | <b>Group<br/>4</b>                                                          | <b>Group 5</b>                                                             | <b>Total</b> |
|--------------------------------------|------------------|-----------------------------------------|--------------------------|--------------------------------------------|-----------------------------------------------------------------------------------------------------------------------------------------------------------------------------------------------------------------|-----------------------------------------------------------------------------|----------------------------------------------------------------------------|--------------|
| <b>Animal</b>                        | <b>Route</b>     | <b>Years<br/>wise<br/>break-<br/>up</b> | <b>Control<br/>(PBS)</b> | <b>Control<br/>strain<br/>EAEC<br/>042</b> | <b>EAEC strains from<br/>human source (n=30)<br/>{Acute diarrheal<br/>(n=13), healthy (n=7),<br/>immunocompromised<br/>patients (n=7),<br/>malnourished<br/>children (n=3),<br/>chronic diarrhea<br/>(n=3)}</b> | <b>EAEC<br/>strains<br/>from<br/>animal<br/>source<br/>(10<br/>strains)</b> | <b>EAEC strains<br/>from<br/>environmental<br/>source (10<br/>strains)</b> |              |
| Six<br>week<br>old<br>male<br>BALB/c | Intragastrically | 1 <sup>st</sup> year                    | 6 mice                   | 6 mice                                     | 6x30=180 mice                                                                                                                                                                                                   | 6x10=60<br>mice                                                             | 6x10=60 mice                                                               | 312<br>mice  |
